# Supplementary material for: Blunted Counterregulatory Hormone Responses to Hypoglycemia in Young Children and Adolescents With Well-Controlled Type 1 Diabetes
Source: Oxford University Press journal article supplement (doi:10.2337/dc08-2298), 2009-08-12
Supplement: dc08-2298_direcnet_study_grp_appendix_.doc [file dc08-2298_direcnet_study_grp_appendix_.doc]

**Appendix**

**Diabetes Research in Children Network (DirecNet) Study Group**

**Clinical Centers:** (Listed in alphabetical order with clinical center name, city, and state. Personnel are listed as (PI) for Principal Investigator, (I) for co-Investigator and (C) for Coordinators.) **(1) Barbara Davis Center for Childhood Diabetes, University of Colorado, Denver, CO:** H. Peter Chase, MD (PI); Rosanna Fiallo-Scharer, MD (I); Laurel Messer, RN (C); **(2) Department of Pediatrics, University of Iowa Carver College of Medicine, Iowa City, IA:** Eva Tsalikian, MD (PI); Michael J. Tansey, MD (I); Julie Coffey, MSN (C); Joanne Cabbage (C); **(3) Nemours Children’s Clinic, Jacksonville, FL:** Tim Wysocki, PhD, ABPP (PI); Nelly Mauras, MD (I); Larry A. Fox, MD (I); Keisha Bird, MSN (C); Kim Englert, RN (C); **(4) Division of Pediatric Endocrinology and Diabetes, Stanford University, Stanford, CA:** Bruce A. Buckingham, MD (PI); Darrell M. Wilson, MD; Paula Clinton, RD, CDE (C); Kimberly Caswell, APRN; (**5) Department of Pediatrics, Yale University School of Medicine, New Haven, CT:** Stuart A. Weinzimer, MD (PI); William V. Tamborlane, MD (I); Amy Steffen (C); **Coordinating Center: Jaeb Center for Health Research, Tampa, FL:** Roy W. Beck, MD, PhD; Katrina J. Ruedy, MSPH; Craig Kollman, PhD; Dongyuan Xing, MPH; Judy Jackson; **University of Minnesota Central Laboratory:** Michael W. Steffes, MD, PhD; Jean M. Bucksa, CLS; Maren L. Nowicki, CLS; Carol A. Van Hale, CLS; Vicky Makky, CLS; **National Institutes of Health:** Gilman D. Grave, MD; Mary Horlick, PhD, Karen Teff, PhD; Karen K. Winer, MD**; Data and Safety Monitoring Board:** Dorothy M. Becker, MBBCh; Patricia Cleary, MS; Christopher M. Ryan, PhD; Neil H. White, MD, CDE; Perrin C. White, MD
